# Supplementary material for: Longitudinal Predictors of Self-Regulation at School Entry: Findings from the All Our Families Cohort
Source: PubMed Central journal article supplement (PMC7602711; doi:10.3390/children7100186), 2020-10-16
Supplement: children-07-00186-s001.pdf [file children-07-00186-s001.pdf]

Supplementary Material

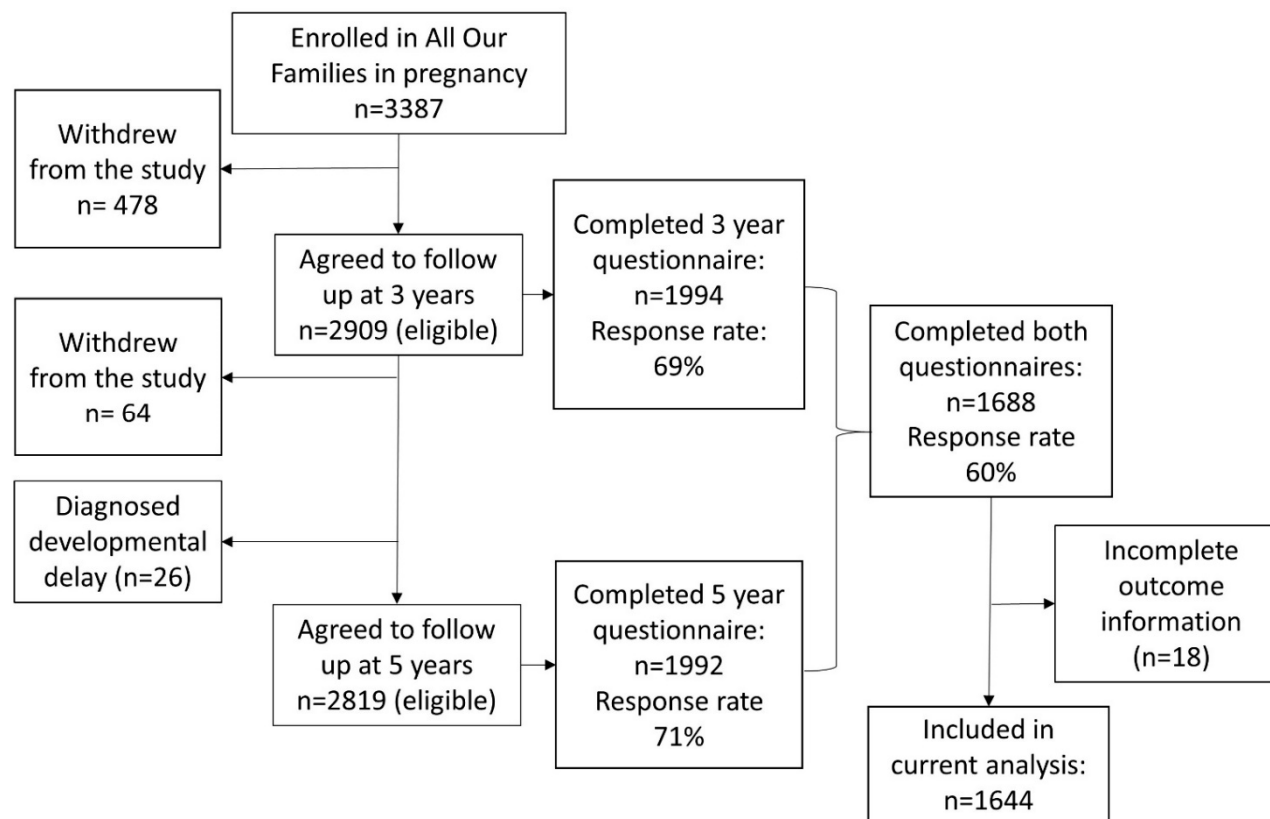

Figure S1. Flow chart for participant enrollment and response rate.

.Table S1: Adjusted Odd Ratios for poor self-regulation using continuous predictors.

| Models                               | Model 1:<br>Overall poor self-regulation |                     | Model 2:<br>Severe poor self-regulation |                     | Model 3:<br>Inattention |                     | Model 4: Low Emotional Control |                     | Model 5: Low Behavioral Control |                     |
|--------------------------------------|------------------------------------------|---------------------|-----------------------------------------|---------------------|-------------------------|---------------------|--------------------------------|---------------------|---------------------------------|---------------------|
|                                      | AOR                                      | 95% CI              | AOR                                     | 95% CI              | AOR                     | 95% CI              | AOR                            | 95% CI              | AOR                             | 95% CI              |
| Increasing income                    | 0.88                                     | (0.82, 0.95)        | 0.97                                    | (0.83, 1.14)        | 0.88                    | (0.80, 0.97)        | 0.93                           | (0.85, 1.02)        | 0.92                            | (0.83, 1.02)        |
| Maternal anxiety symptoms @ 3yrs     | <b>1.03</b>                              | <b>(1.01, 1.05)</b> | 1.01                                    | (0.98, 1.05)        | <b>1.04</b>             | <b>(1.02, 1.07)</b> | 1.01                           | (0.98, 1.03)        | <b>1.03</b>                     | <b>(1.00, 1.05)</b> |
| Maternal depressive symptoms @ 3yrs  | 1.01                                     | (0.98, 1.03)        | 1.02                                    | (0.98, 1.07)        | 0.99                    | (0.96, 1.02)        | <b>1.03</b>                    | <b>(1.00, 1.06)</b> | 1.01                            | (0.98, 1.04)        |
| Childcare (10+ hours /wk)            | 1.29                                     | (0.98, 1.71)        | <b>1.79</b>                             | <b>(1.01, 3.16)</b> | <b>1.94</b>             | <b>(1.36, 2.77)</b> | 0.99                           | (0.70, 1.38)        | 1.29                            | (0.89, 1.86)        |
| Male child                           | 1.27                                     | (0.98, 1.65)        | <b>2.17</b>                             | <b>(1.22, 3.86)</b> | <b>1.86</b>             | <b>(1.32, 2.62)</b> | 1.05                           | (0.78, 1.43)        | <b>1.58</b>                     | <b>(1.12, 2.23)</b> |
| Screen time (+ 1 hr)                 | <b>1.23</b>                              | <b>(1.03, 1.47)</b> | 1.18                                    | (0.82, 1.71)        | <b>1.42</b>             | <b>(1.13, 1.79)</b> | 1.09                           | (0.89, 1.35)        | 1.12                            | (0.89, 1.41)        |
| Higher hostile/ineffective parenting | <b>1.18</b>                              | <b>(1.13, 1.22)</b> | <b>1.19</b>                             | <b>(1.11, 1.28)</b> | <b>1.14</b>             | <b>(1.09, 1.20)</b> | <b>1.16</b>                    | <b>(1.11, 1.21)</b> | <b>1.22</b>                     | <b>(1.16, 1.28)</b> |
| Higher positive parenting            | 1.02                                     | (0.97, 1.08)        | 1.00                                    | (0.89, 1.12)        | 1.03                    | (0.95, 1.10)        | 1.01                           | (0.95, 1.09)        | 1.02                            | (0.95, 1.10)        |

AOR: Adjusted Odds Ratio – adjusted for all variables in the table in addition to maternal age, maternal education, and child age. Original models included the following interaction terms: income\*childcare, maternal anxiety\*childcare, maternal depression\*childcare, male child\*hostile parenting, male child\*positive parenting, screen time\*hostile parenting, screen time\*positive parenting). All interaction terms were dropped because they were not statistically significant (0.05). All statistically significant predictors (at 0.05) are bolded.
